# Supplementary material
Source: PubMed Central journal article supplement (PMC4821010)
Supplement: NIHMS767397-supplement-Suppl_Info.pdf [file NIHMS767397-supplement-Suppl_Info.pdf]

**Supplementary Table: Clavien grading of postsurgical complications (90 days)**

| Event                       | Grade 1 | Grade 2 | Grade 3a | Grade 3b | Grade 4a |
|-----------------------------|---------|---------|----------|----------|----------|
| Bladder spasms              | 1       | 0       | 0        | 0        | 0        |
| Superficial wound infection | 3       | 0       | 0        | 0        | 0        |
| Ileus*                      | 0       | 1       | 0        | 0        | 0        |
| Anastomotic urine leak      | 2       | 0       | 0        | 0        | 0        |
| Pelvic lymphocele           | 0       | 0       | 1        | 0        | 0        |
| Anastomotic stricture       | 0       | 0       | 0        | 1        | 0        |
| Myocardial infarction       | 0       | 0       | 0        | 0        | 1        |

\*Patient required right ileal ureter for long segment ureteral stricture related to renal stones.

## Supplementary Results

### *Treatment upon postoperative failure*

Of the 13 patients who experienced post-operative failure, 11 failed before one year after the surgery and 2 after. In the 11 patients who failed before one year, hormonal treatment was primarily used in 10 and post-operative radiation in 1 patient. The 2 patients who experienced failure after 1 year received androgen deprivation therapy.

### *Functional recovery*

Information on urinary continence  $\geq 6$  months postoperatively was available for 25 patients. Fourteen of these (56%) used no pads, 2 (8%) used no/one pad depending on activity, 2 (8%) used one pad daily and 5 (20%) used two/four pads daily. Thus, 18 patients (72%) were dry or used at the most one pad daily. However, 2 patients (8%) required delayed placement of an artificial urinary sphincter for severe incontinence.

No patient had spontaneous erections 1 year postoperatively, but 3 were potent with either a vacuum-erection device (n=2) or intracavernosal drug injection (n=1).
